# Supplementary material for: Iron-Borophosphate Glass-Catalyzed Regioselective Hydrothiolation of Alkynes under Green Conditions
Source: MDPI journal article supplement (doi:10.3390/catal13071127), 2023-07-20

# Iron-Borophosphate Glass-Catalyzed Regioselective Hydrothiolation of Alkynes under Green Conditions

Nicoli Catholico <sup>1</sup>, Eduarda A. Tessari <sup>2</sup>, Isis J. A. Granja <sup>3</sup>, Martinho J. A. de Sousa <sup>4</sup>,  
Jorlandio F. Felix <sup>5</sup>, Flávia Manarin <sup>2</sup>, Marcelo Godoi <sup>6</sup>, Jamal Rafique <sup>3,4</sup>, Ricardo Schneider <sup>7,\*</sup>,  
Sumbal Saba <sup>3,\*</sup>, Giancarlo V. Botteselle <sup>1,\*</sup>

<sup>1</sup> Department of Chemistry, Midwestern Parana State University-UNICENTRO, Guarapuava, PR 85040-167, Brazil

<sup>2</sup> Center for Engineering and Exact Sciences, Western Parana State University-UNIOESTE, Toledo, PR 85903-000, Brazil

<sup>3</sup> Instituto de Química IQ, Universidade Federal de Goiás-UFG, Goiania, GO 74690-900, Brazil

<sup>4</sup> Institute of Chemistry-INQUI, Federal University of Mato Grosso do Sul-UFMS, Campo Grande, MS 79074-460, Brazil

<sup>5</sup> Institute of Physics, University of Brasilia-UNB, Brasilia, DF 70910 900, Brazil

<sup>6</sup> School of Chemistry and Food, Federal University of Rio Grande-FURG, Santo Antonio da Patrulha, RS 95500 000, Brazil

<sup>7</sup> Group of Polymers and Nanostructures, Federal University of Technology Parana-UTFPR, Toledo, PR 85902 490, Brazil

\* Correspondence: [rschneider@utfpr.edu.br](mailto:rschneider@utfpr.edu.br) (R.S.); [sumbalsaba@ufg.br](mailto:sumbalsaba@ufg.br) (S.S.); [giancarlo@unicentro.br](mailto:giancarlo@unicentro.br) (G.V.B.)

## Contents

1. Characterization of Iron-borophosphate glass (Fe@NaH<sub>2</sub>PO<sub>4</sub>-H<sub>3</sub>BO<sub>3</sub> glass)
2. <sup>1</sup>H and <sup>13</sup>C NMR spectra for all compounds

## 1. Characterization of iron-borophosphate glass

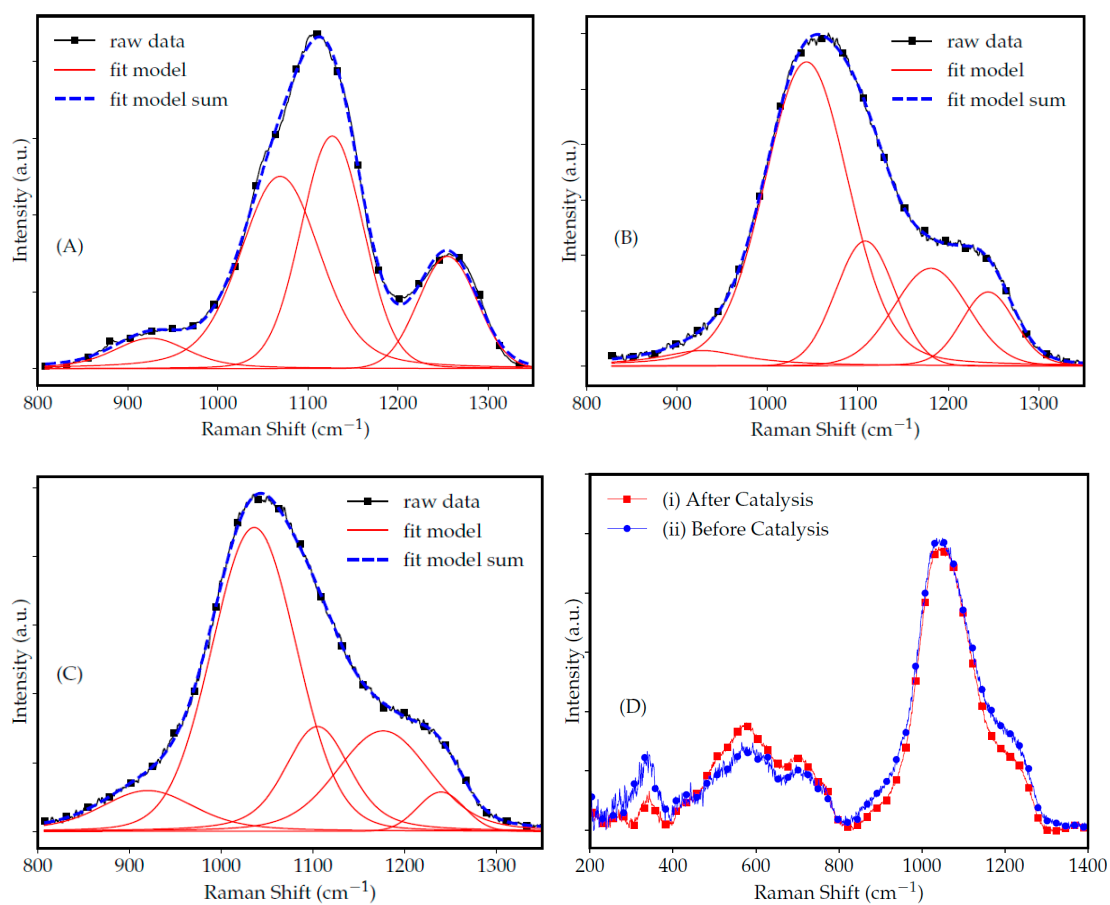

**Figure S1.** Deconvolution spectra of glasses at the region between 800 and 1350  $\text{cm}^{-1}$  with **(A)** 0%  $\text{Al}_2\text{O}_3$  and 0%  $\text{Fe}_2\text{O}_3$ , **(B)** 10%  $\text{Al}_2\text{O}_3$  and 0%  $\text{Fe}_2\text{O}_3$ , and **(C)** 10%  $\text{Al}_2\text{O}_3$ , 6%  $\text{Fe}_2\text{O}_3$ , and **(D)** full Raman spectra of the glass-based catalyst (i) after and (ii) before reaction.

## 2. $^1\text{H}$ and $^{13}\text{C}$ NMR spectra for all compounds

$^1\text{H}$  NMR spectrum of compound **3a** in  $\text{CDCl}_3$  (300 MHz)

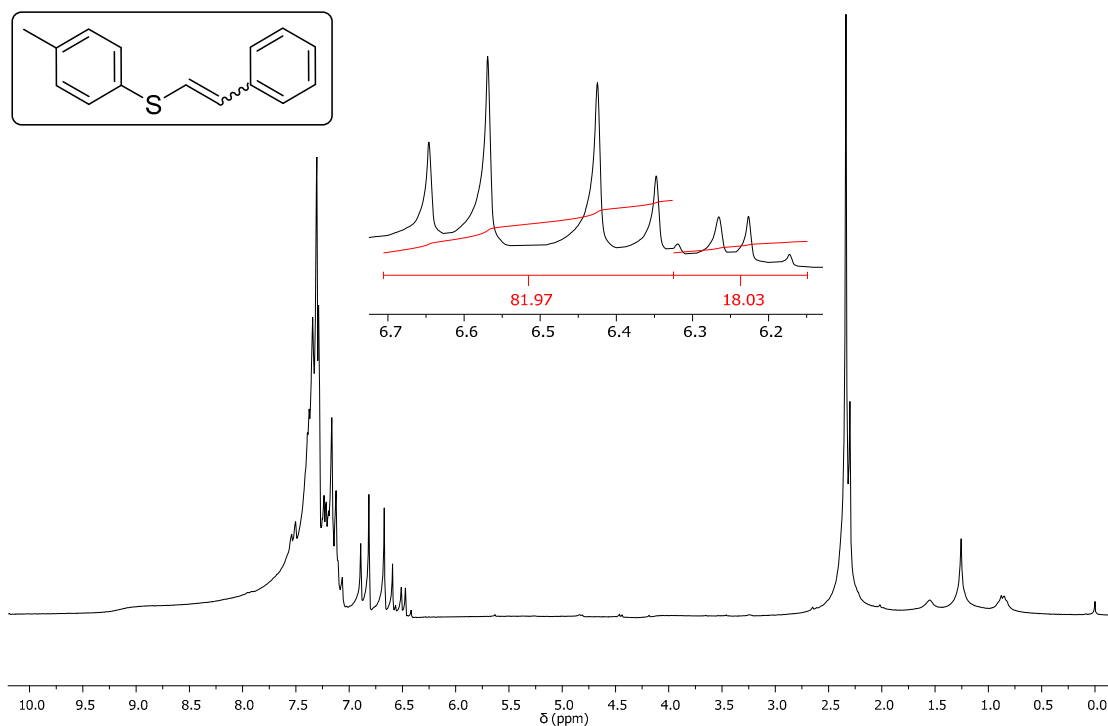

$^{13}\text{C}$  NMR spectrum of compound **3a** in  $\text{CDCl}_3$  (75 MHz)

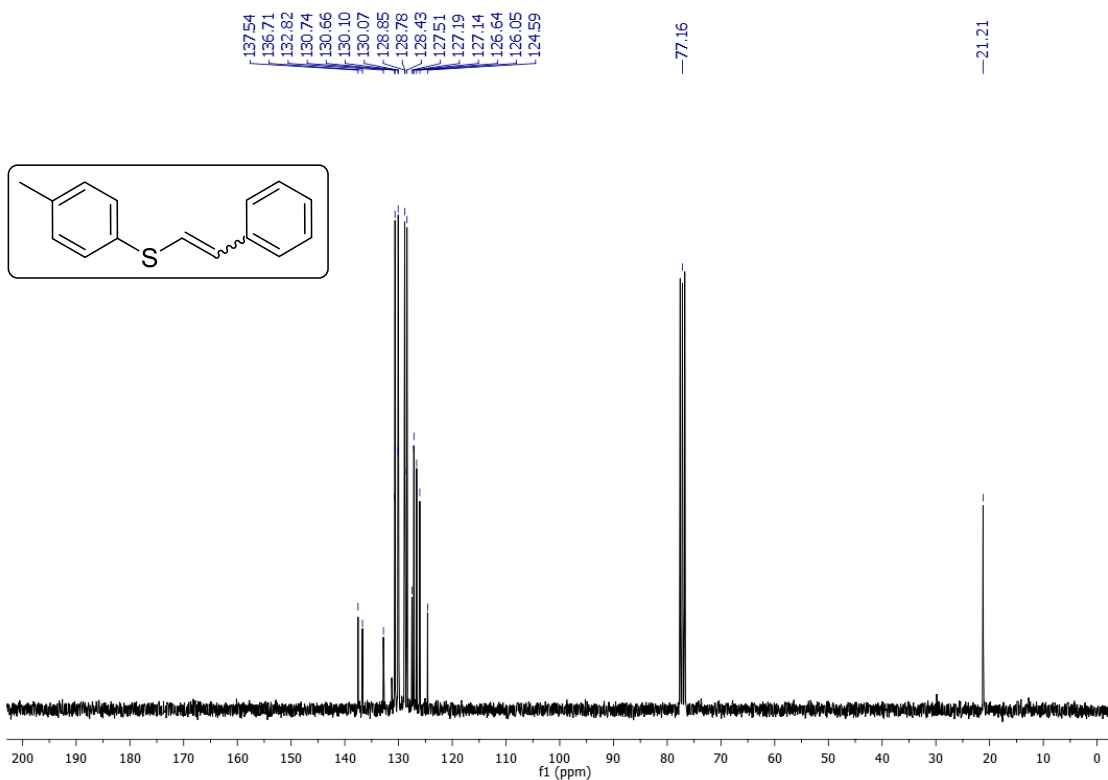

$^1\text{H}$  NMR spectrum of compound **3b** in  $\text{CDCl}_3$  (300 MHz)

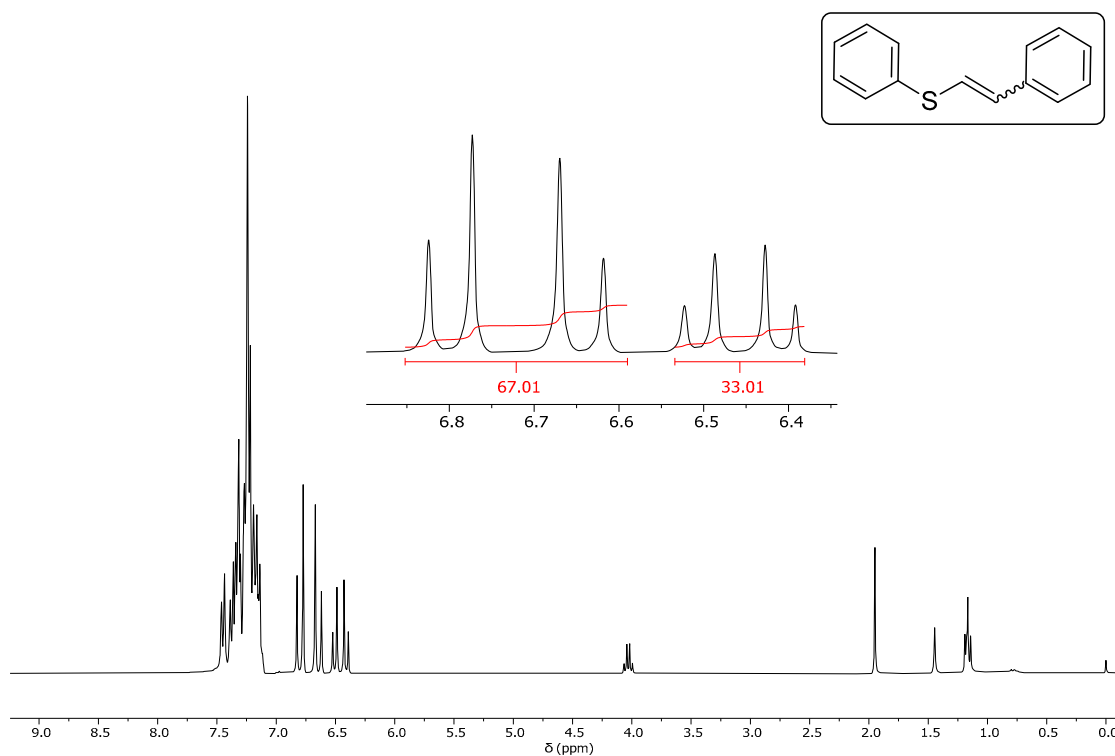

$^{13}\text{C}$  NMR spectrum of compound **3b** in  $\text{CDCl}_3$  (75 MHz)

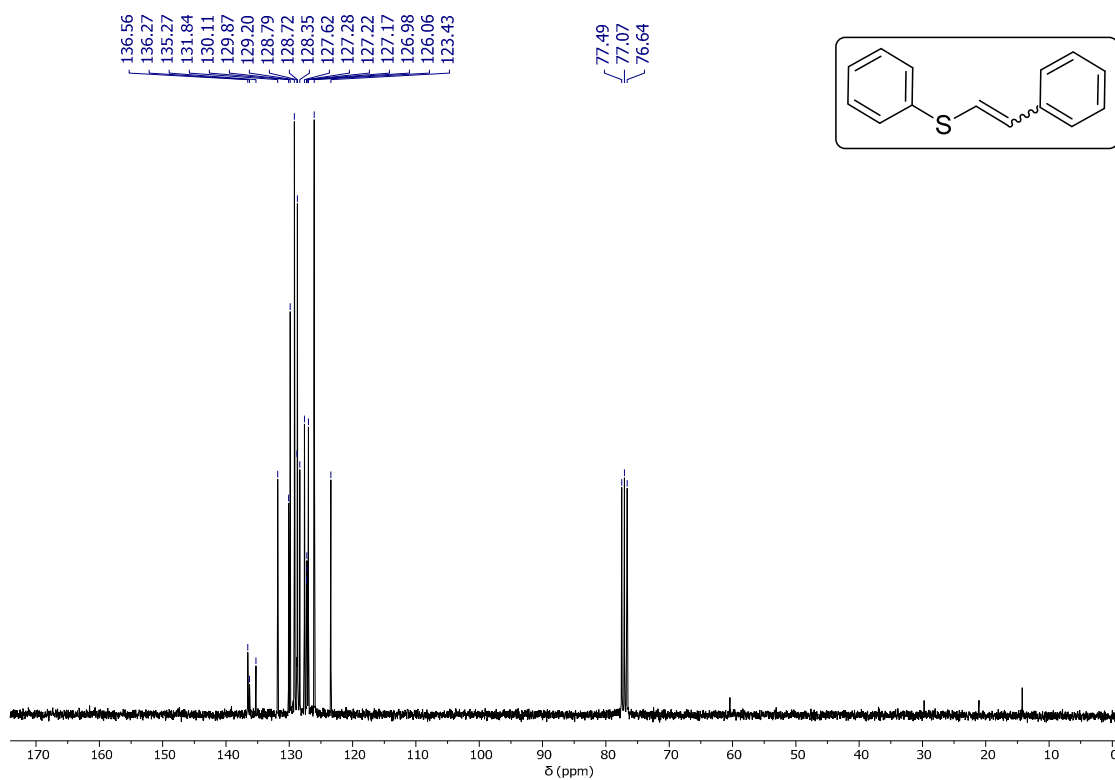

$^1\text{H}$  NMR spectrum of compound **3c** in  $\text{CDCl}_3$  (300 MHz)

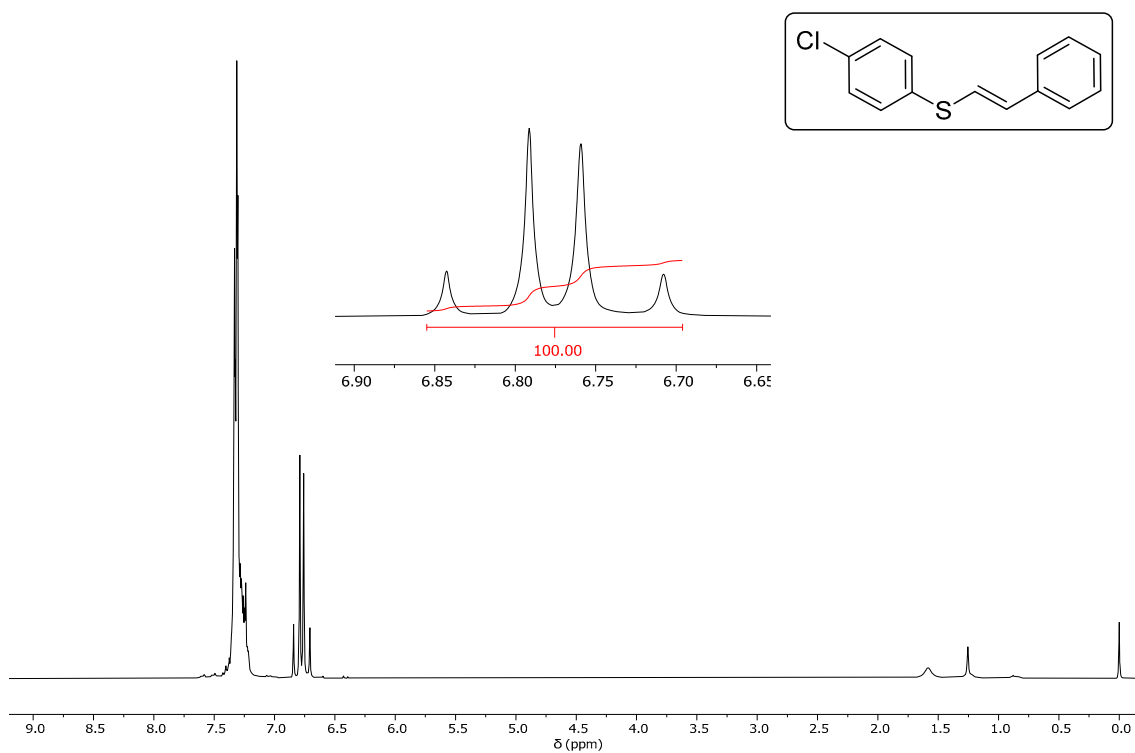

$^{13}\text{C}$  NMR spectrum of compound **3c** in  $\text{CDCl}_3$  (75 MHz)

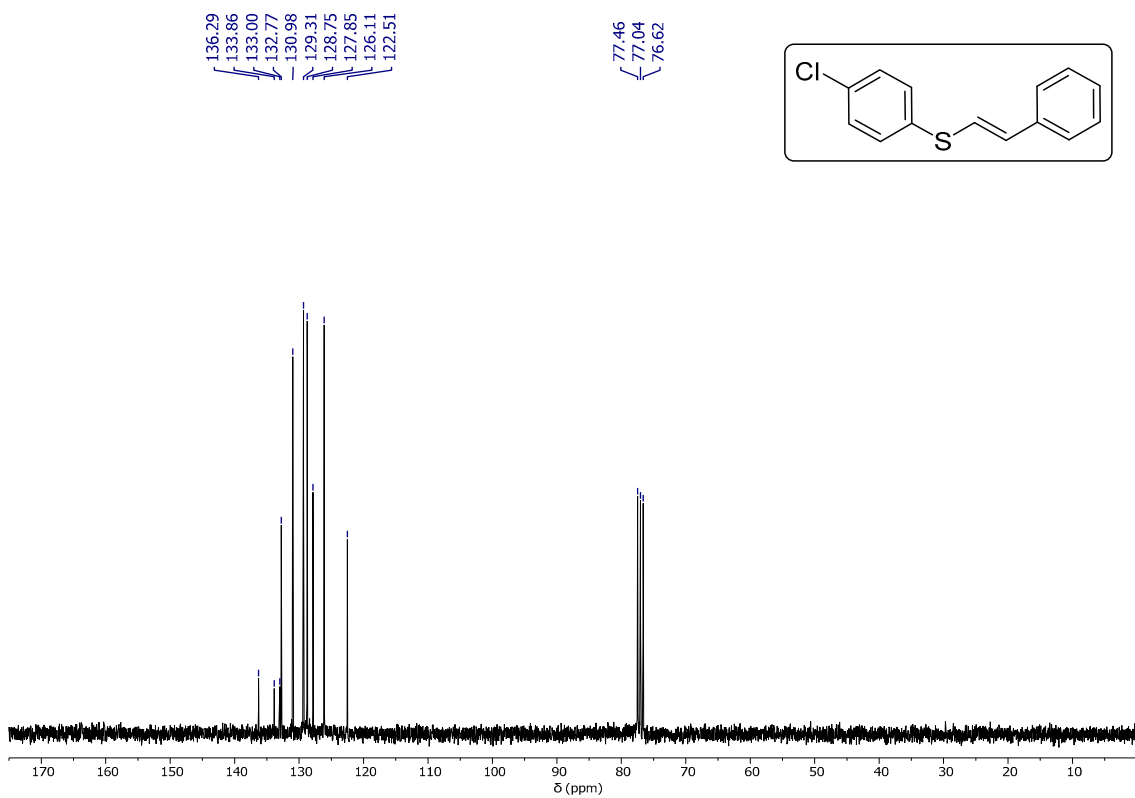

$^1\text{H}$  NMR spectrum of compound **3d** in  $\text{CDCl}_3$  (300 MHz)

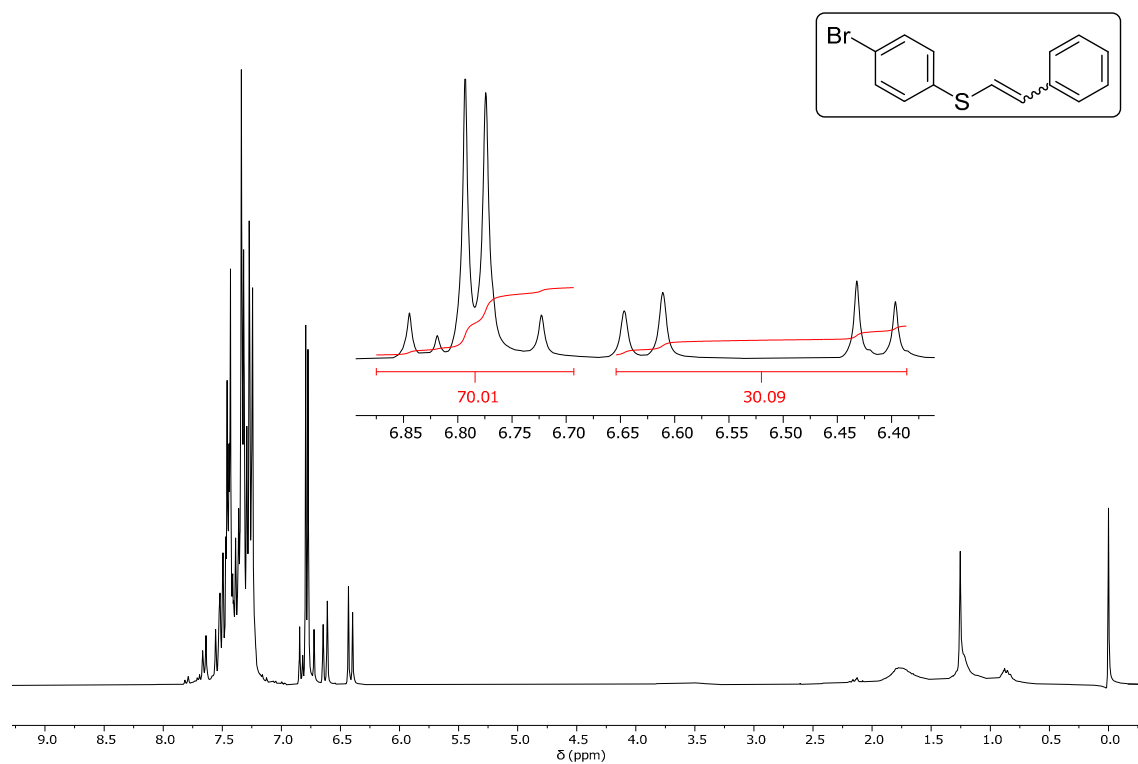

$^{13}\text{C}$  NMR spectrum of compound **3d** in  $\text{CDCl}_3$  (75 MHz)

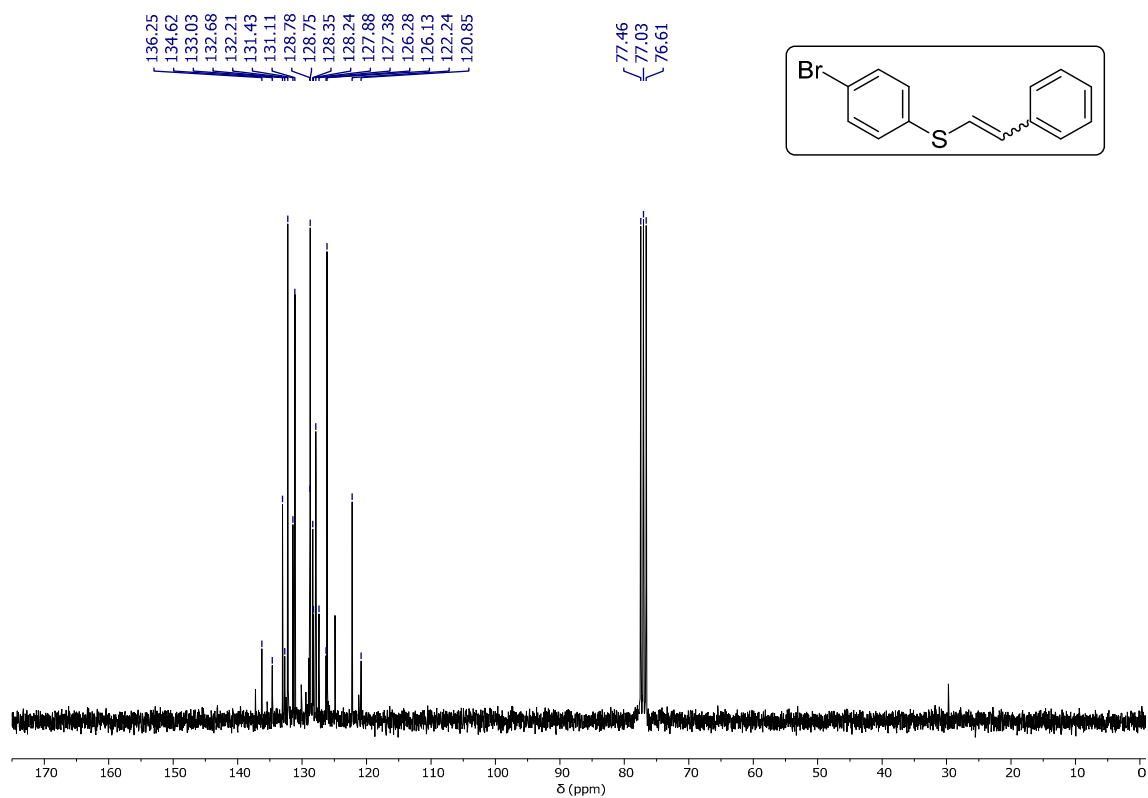

$^1\text{H}$  NMR spectrum of compound **3e** in  $\text{CDCl}_3$  (300 MHz)

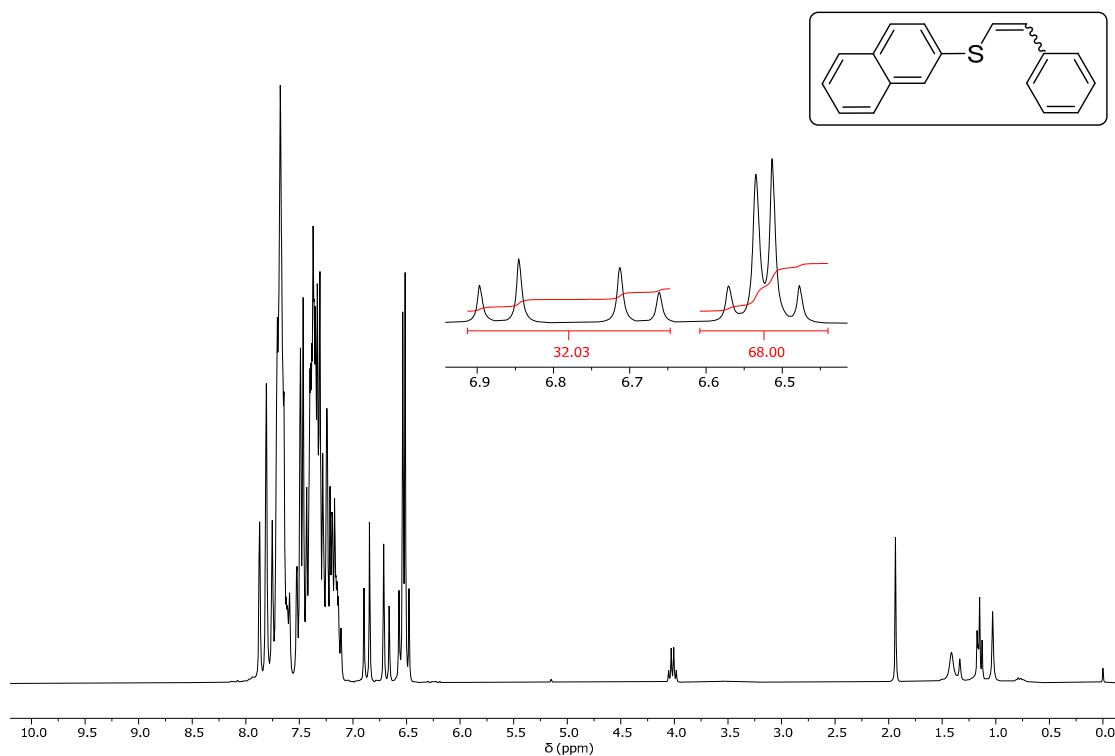

$^{13}\text{C}$  NMR spectrum of compound **3e** in  $\text{CDCl}_3$  (75 MHz)

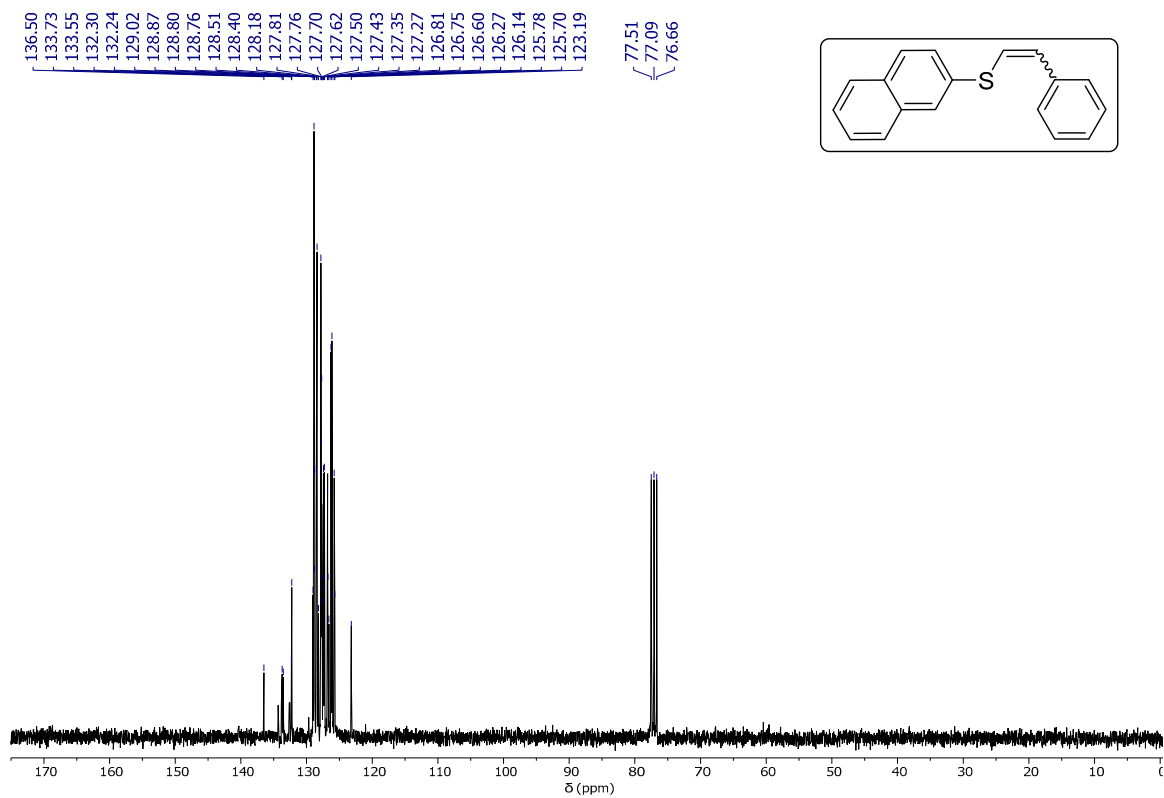

$^1\text{H}$  NMR spectrum of compound **3f** in  $\text{CDCl}_3$  (300 MHz)

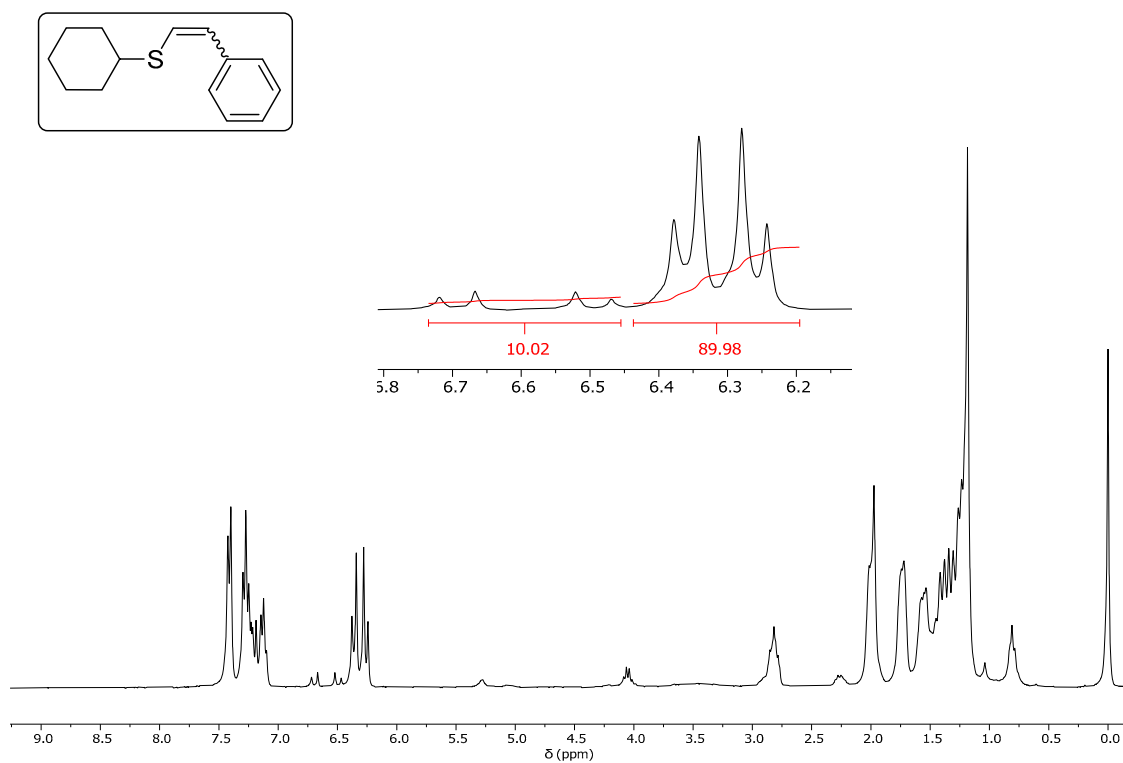

$^{13}\text{C}$  NMR spectrum of compound **3f** in  $\text{CDCl}_3$  (75 MHz)

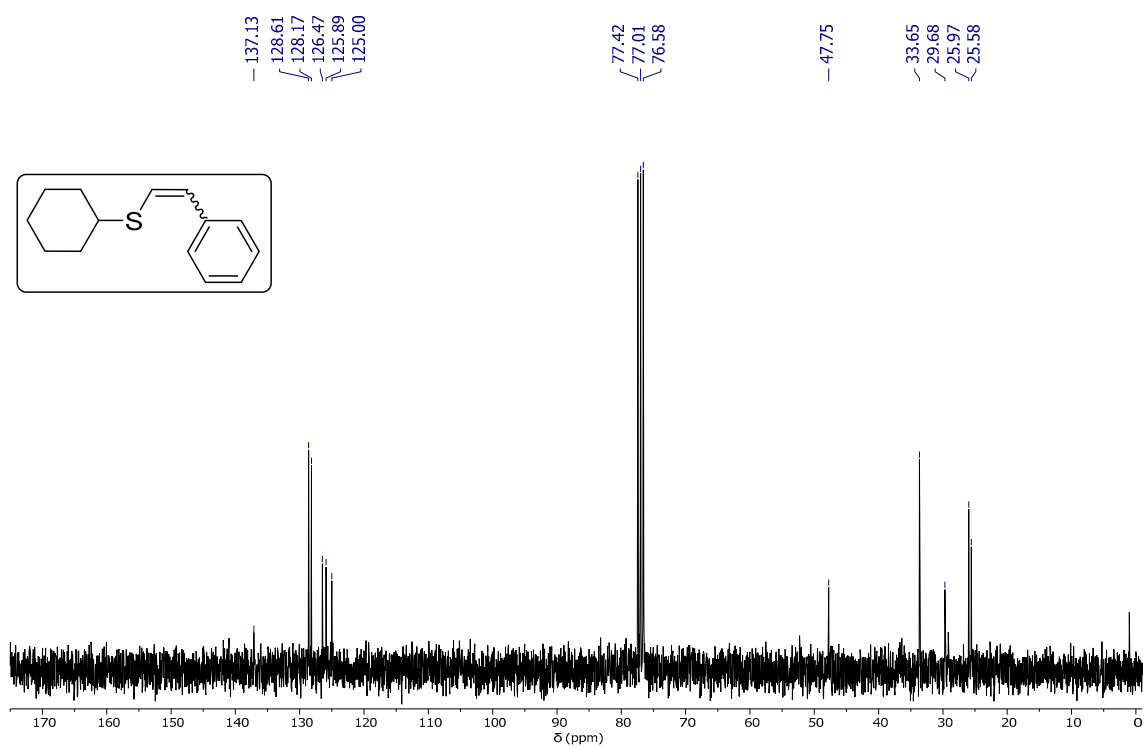

$^1\text{H}$  NMR spectrum of compound **3g** in  $\text{CDCl}_3$  (300 MHz)

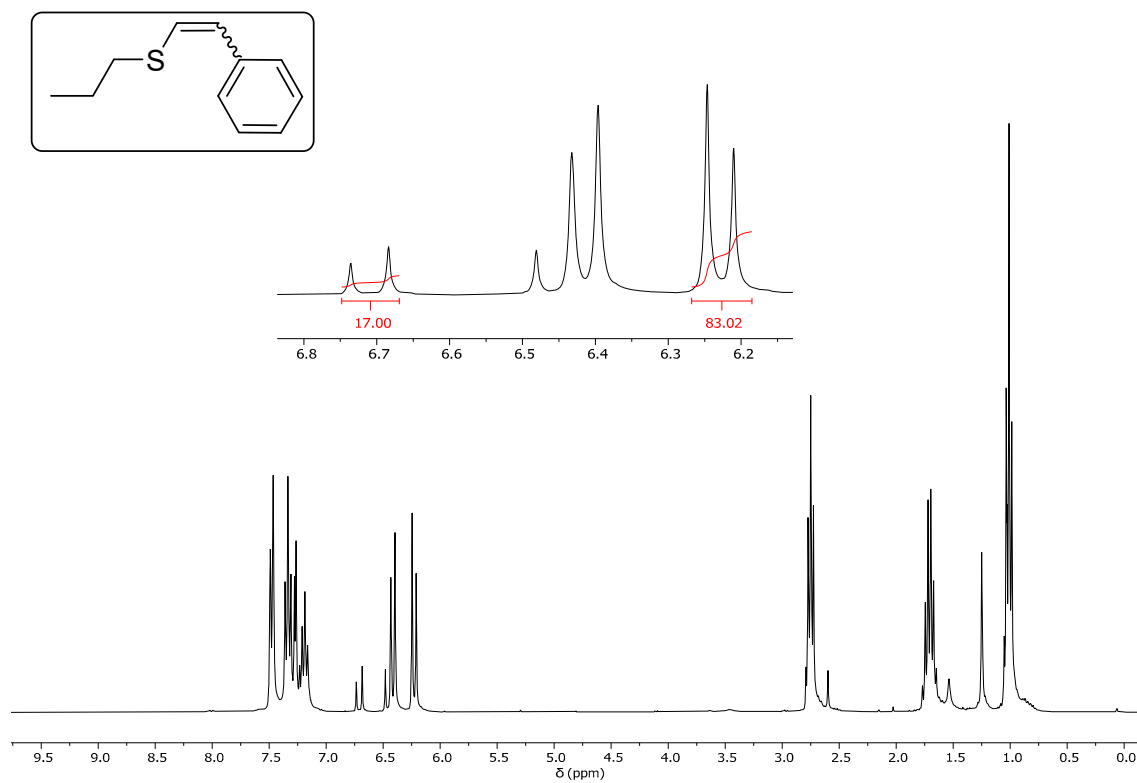

$^{13}\text{C}$  NMR spectrum of compound **3g** in  $\text{CDCl}_3$  (75 MHz)

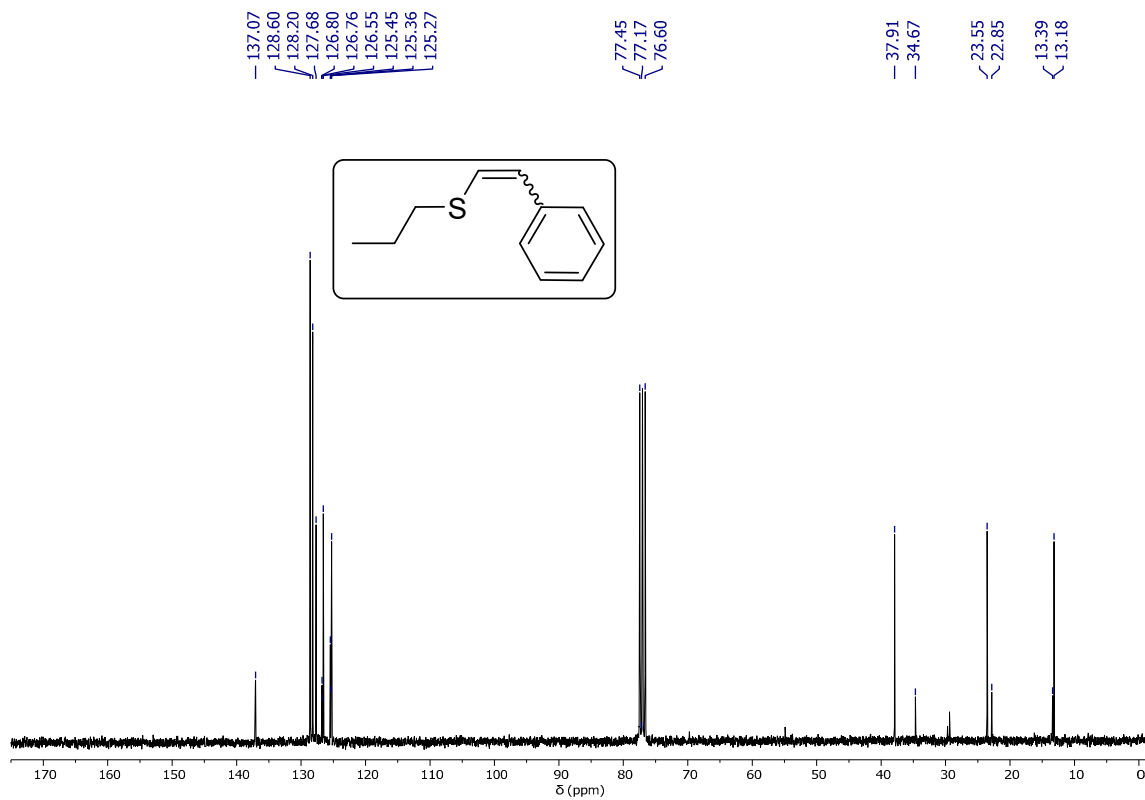

$^1\text{H}$  NMR spectrum of compound **3h** in  $\text{CDCl}_3$  (300 MHz)

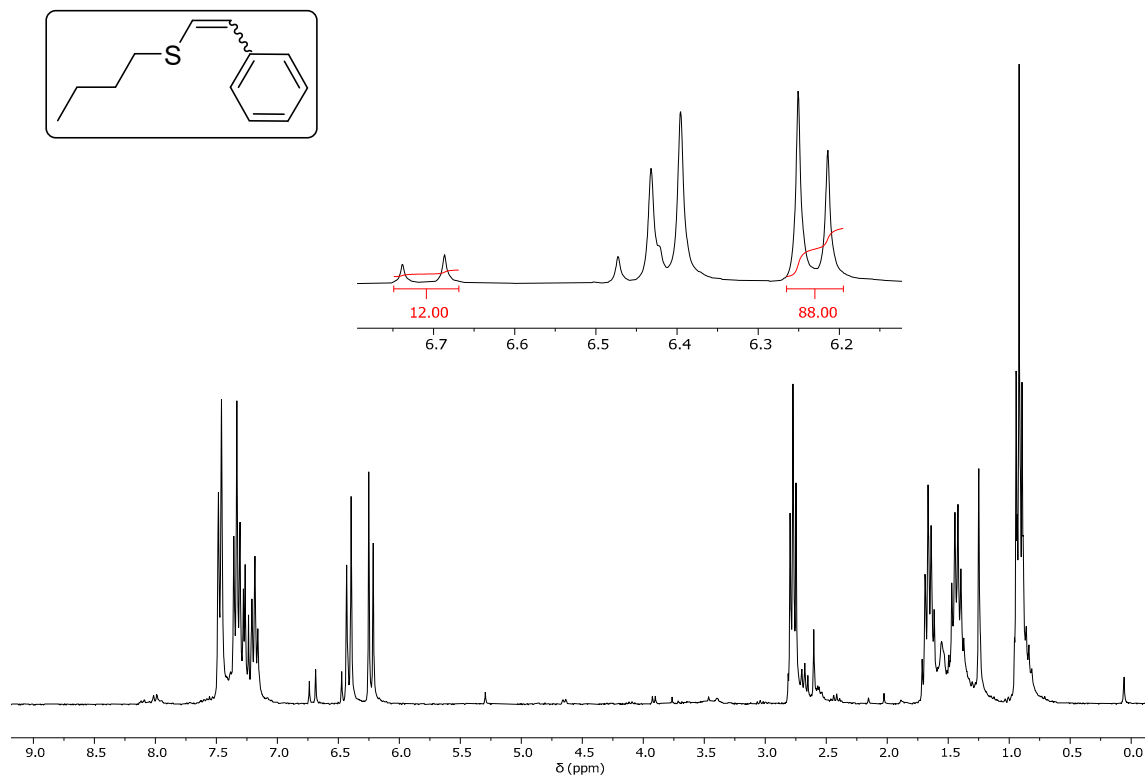

$^{13}\text{C}$  NMR spectrum of compound **3h** in  $\text{CDCl}_3$  (75 MHz)

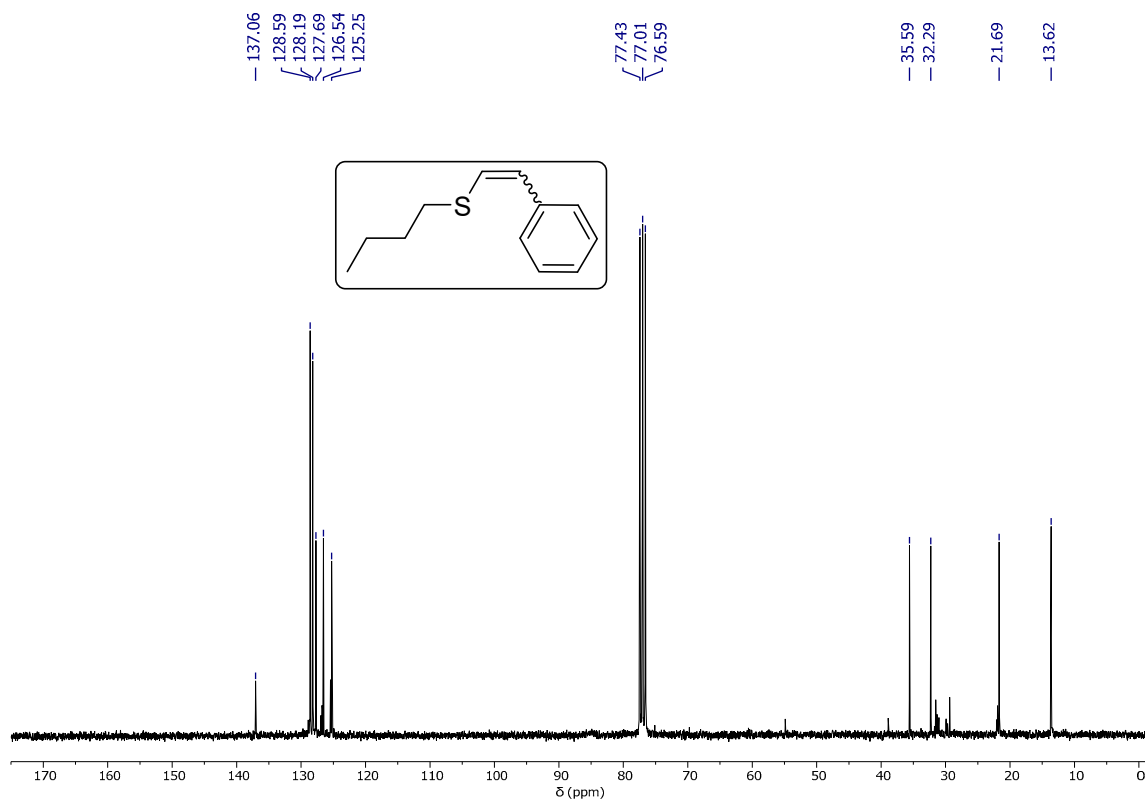

$^1\text{H}$  NMR spectrum of compound **3i** in  $\text{CDCl}_3$  (300 MHz)

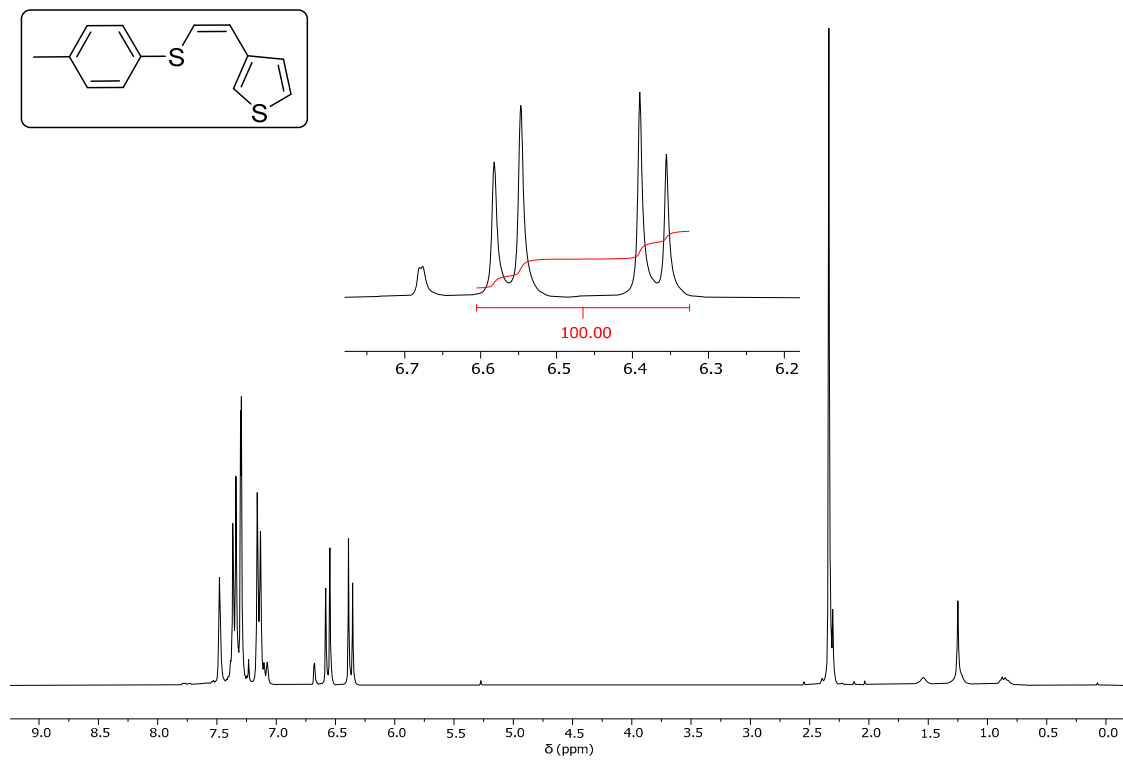

$^{13}\text{C}$  NMR spectrum of compound **3i** in  $\text{CDCl}_3$  (75 MHz)

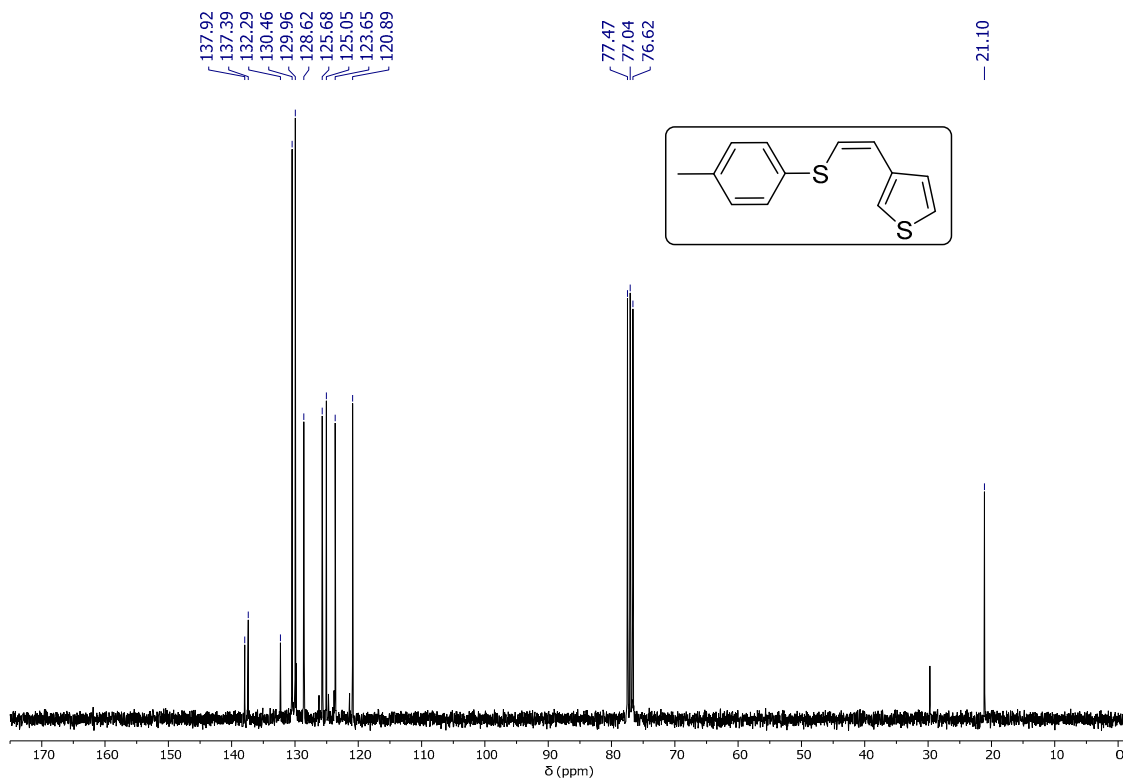

$^1\text{H}$  NMR spectrum of compound **3j** in  $\text{CDCl}_3$  (300 MHz)

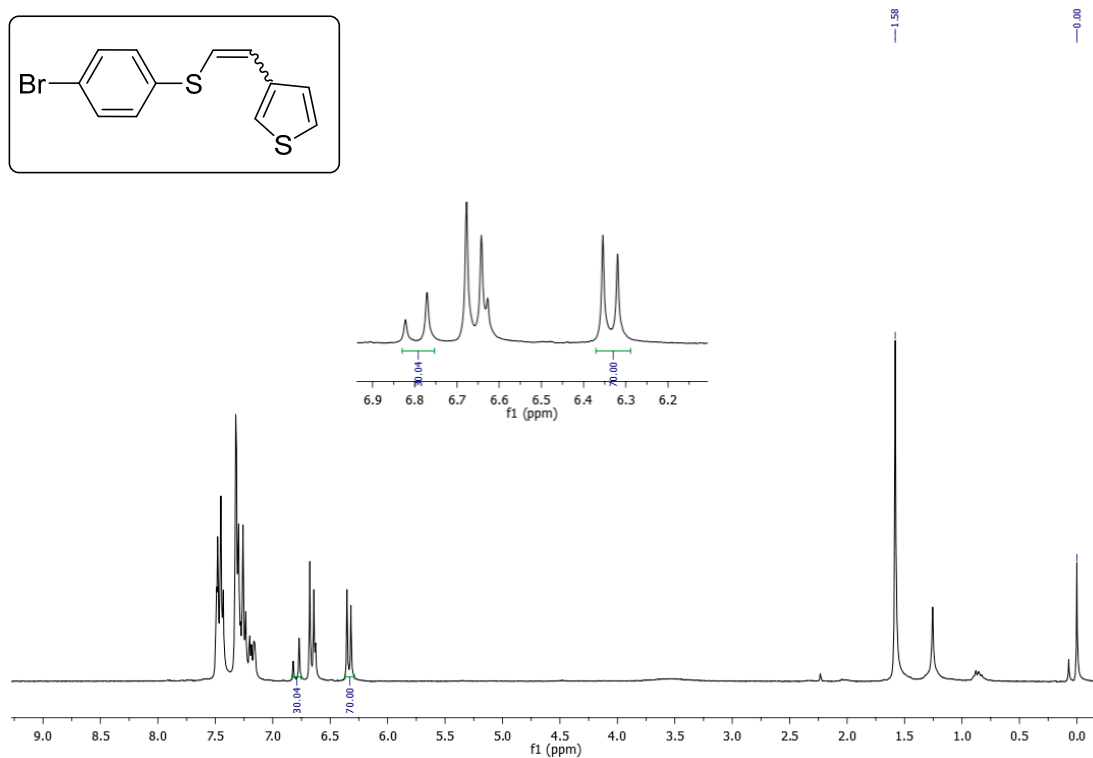

$^{13}\text{C}$  NMR spectrum of compound **3j** in  $\text{CDCl}_3$  (75 MHz)

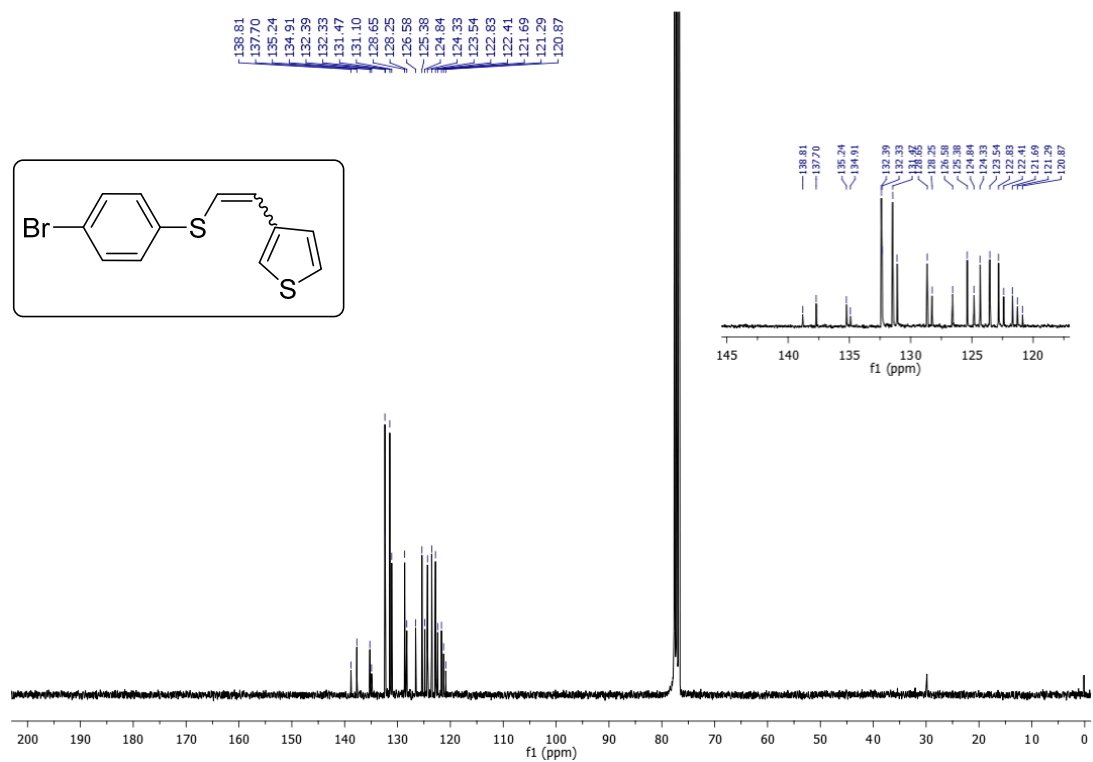

Supplement: s1 [file s1]
